# Supplementary material
Source: Springer Nature journal article supplement (https://www.springermedizin.de/resource/supplementary/13058_2011_2869_MOESM5_ESM.pdf/9702758)

**A** All cases (n=190)

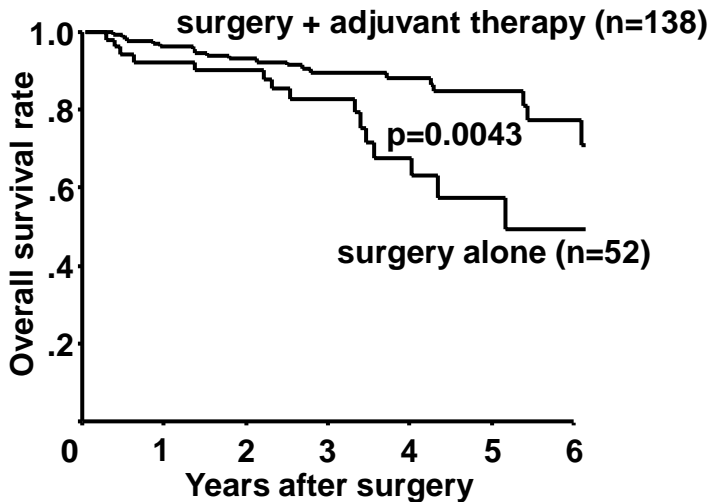

**B** Stage II (n=107)

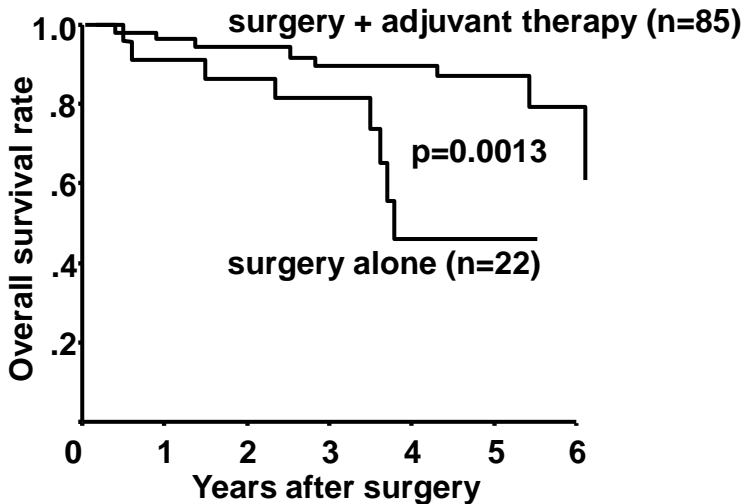

Supplement: MOESM5 [file 9702758]
